# Supplementary material
Source: publisher figshare collection journal article supplement (https://acs.figshare.com/ndownloader/files/10859921)
Supplement: Supplementary file 1 [file 10859921]

## **Supporting Information**

### **Roles of cation and anion of amino acid anion-functionalized ionic liquids immobilized into a porous support for CO<sub>2</sub> capture**

Yusuke Uehara, Davood Karami and Nader Mahinpey

*Department of Chemical and Petroleum Engineering, Schulich School of Engineering,  
University of Calgary, Calgary, AB T2N 1N4, Canada*

#### **AUTHOR INFORMATION**

##### **Corresponding Author**

\*Phone: (403) 210-6503. Fax: (403) 284-4852. E-mail: [nader.mahinpey@ucalgary.ca](mailto:nader.mahinpey@ucalgary.ca).

**Table S1.** Surface areas and pore volumes of PMMA, [EMIM][Lys]-PMMA, [P<sub>4444</sub>][Lys]-PMMA and [P<sub>4444</sub>][Gly]-PMMA with various loadings.

| type                                 | BET surface area    | BJH adsorption cumulative        |
|--------------------------------------|---------------------|----------------------------------|
|                                      | [m <sup>2</sup> /g] | pore volume [cm <sup>3</sup> /g] |
| PMMA                                 | 527                 | 1.12                             |
| [EMIM][Lys]-PMMA (10%)               | 327                 | 0.93                             |
| [EMIM][Lys]-PMMA (50%)               | 38                  | 0.35                             |
| [P <sub>4444</sub> ][Lys]-PMMA (10%) | 256                 | 0.99                             |
| [P <sub>4444</sub> ][Lys]-PMMA (50%) | 37                  | 0.32                             |
| [P <sub>4444</sub> ][Gly]-PMMA (10%) | 378                 | 1.04                             |
| [P <sub>4444</sub> ][Gly]-PMMA (30%) | 118                 | 0.69                             |
| [P <sub>4444</sub> ][Gly]-PMMA (50%) | 26                  | 0.25                             |
| [P <sub>4444</sub> ][Gly]-PMMA (70%) | 9.0                 | 0.02                             |

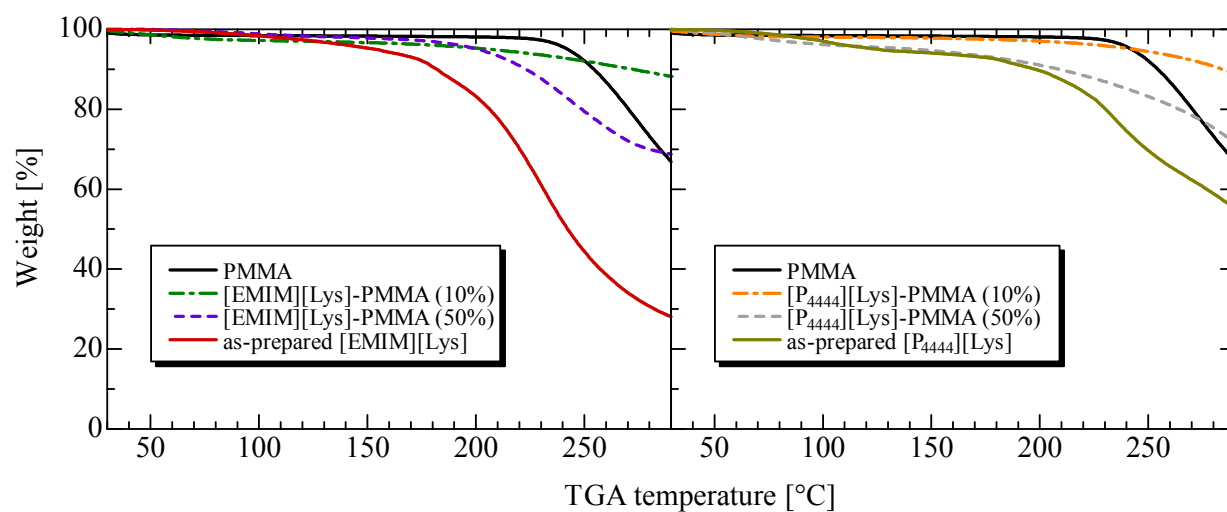

**Figure S1.** TGA curves of PMMA, [EMIM][Lys]-PMMA and [P<sub>4444</sub>][Lys]-PMMA with 10 and 50 wt% loadings, and as-prepared [EMIM][Lys] and [P<sub>4444</sub>][Lys] under N<sub>2</sub> atmosphere at a heating rate of 10 °C /min.

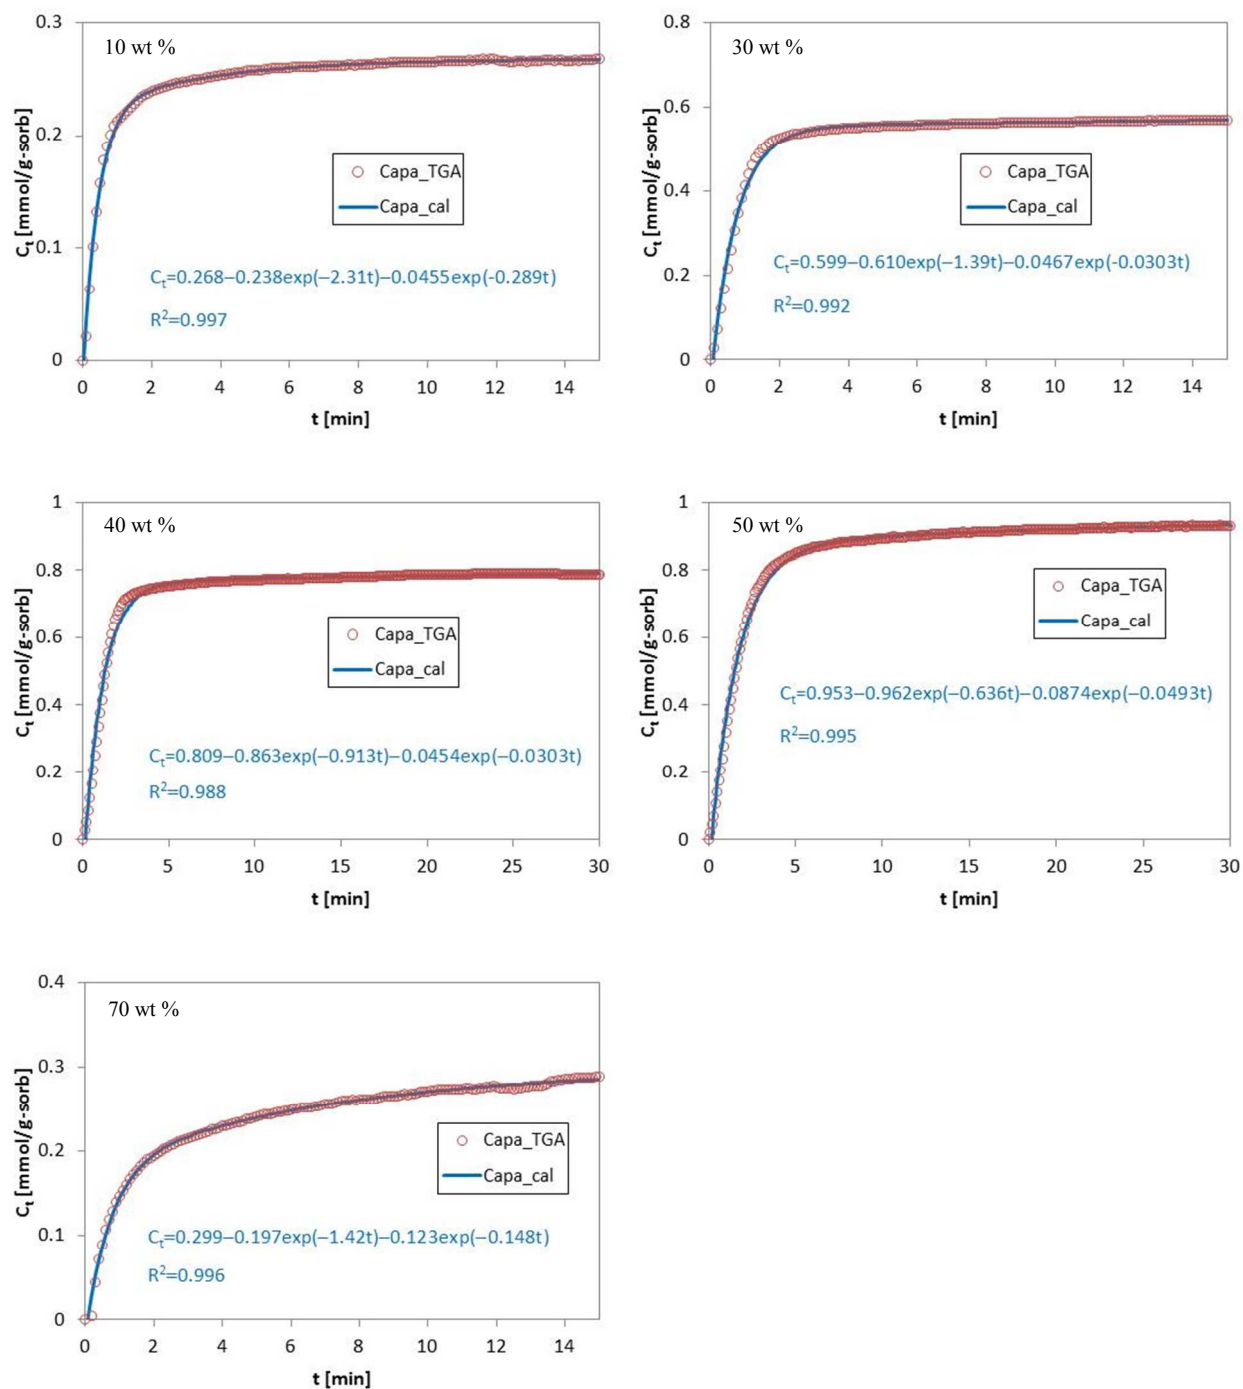

**Figure S2.** Fitted curves for CO<sub>2</sub> sorption experimental data of [EMIM][Gly]-PMMA sorbents with different loadings (Capa\_TGA and Capa\_cal represent the experimental and calculated data, respectively).

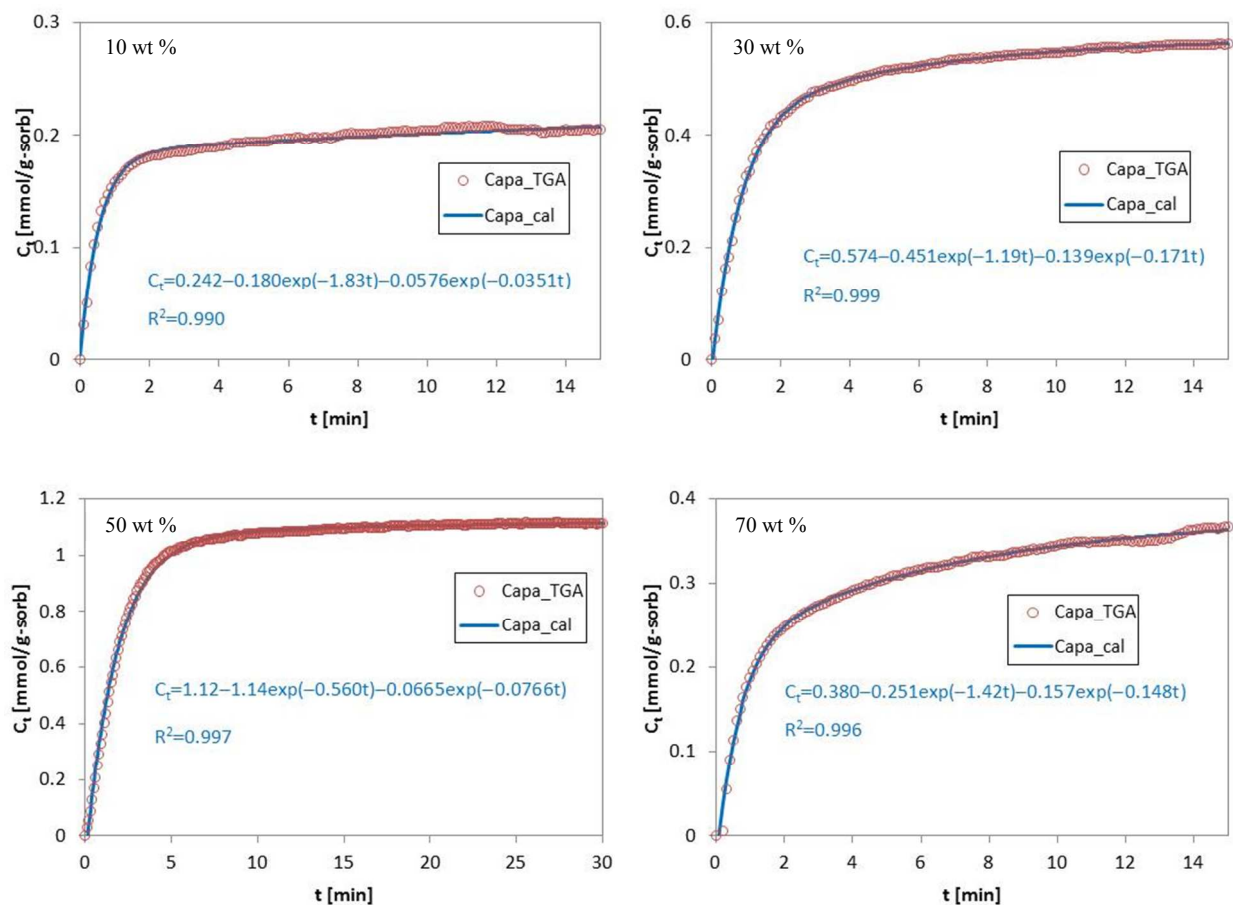

**Figure S3.** Fitted curves for CO<sub>2</sub> sorption experimental data of [EMIM][Lys]-PMMA sorbents with different loadings (Capa\_TGA and Capa\_cal represent the experimental and calculated data, respectively).

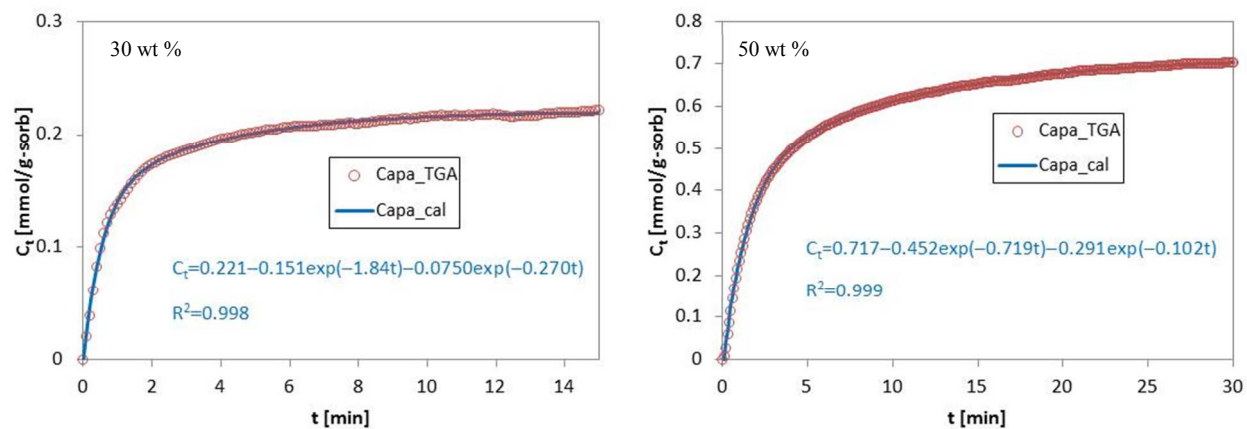

**Figure S4.** Fitted curves for CO<sub>2</sub> sorption experimental data of [EMIM][His]-PMMA sorbents with different loadings (Capa\_TGA and Capa\_cal represent the experimental and calculated data, respectively).

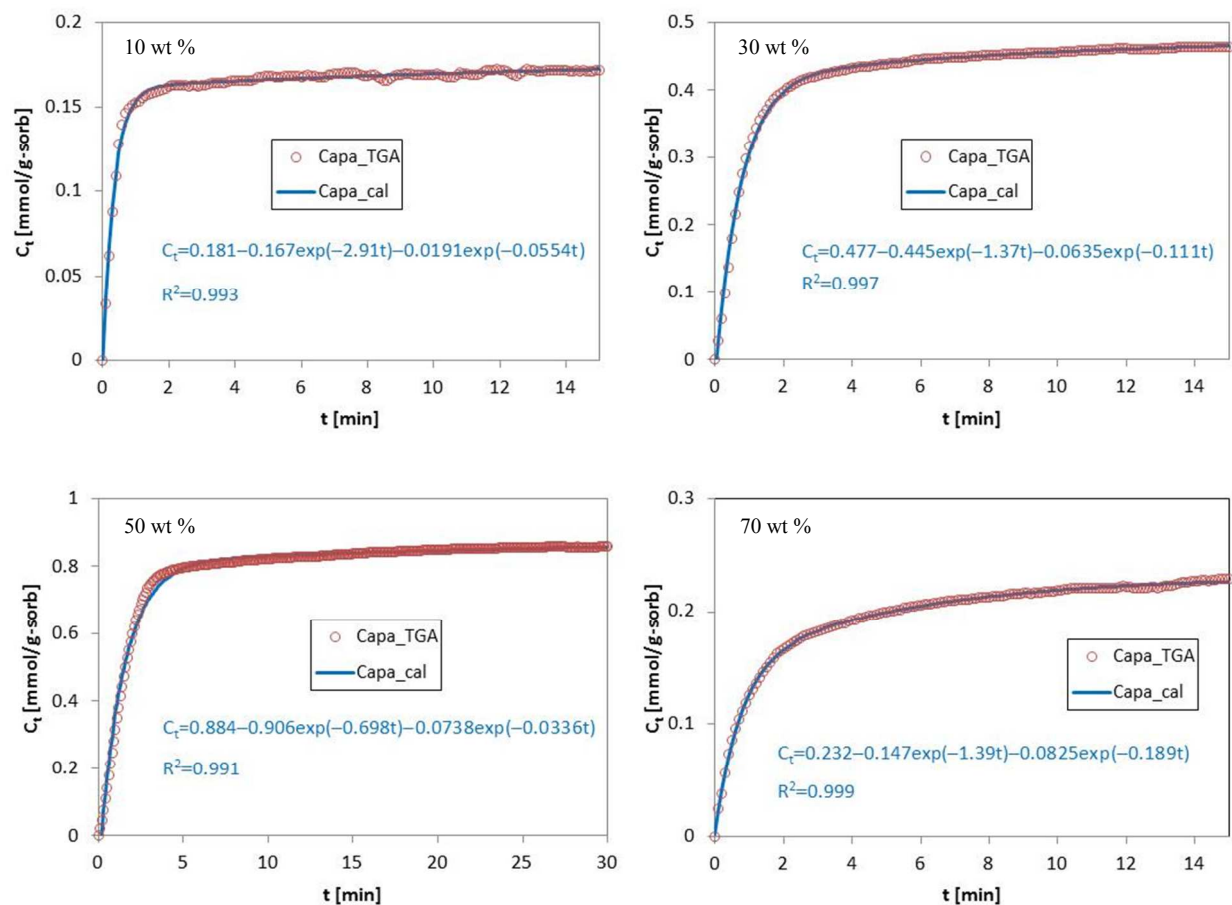

**Figure S5.** Fitted curves for CO<sub>2</sub> sorption experimental data of [EMIM][Ala]-PMMA sorbents with different loadings (Capa\_TGA and Capa\_cal represent the experimental and calculated data, respectively).

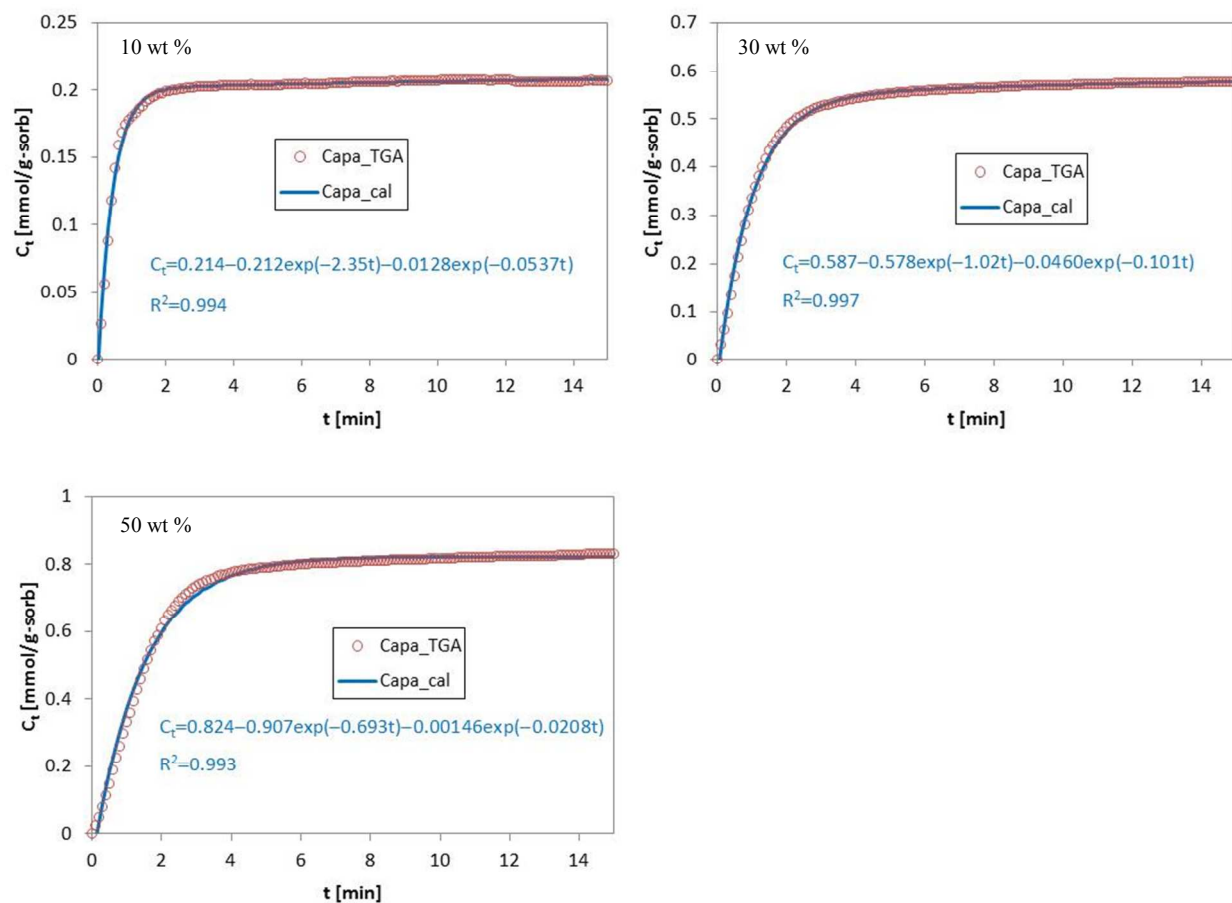

**Figure S6.** Fitted curves for CO<sub>2</sub> sorption experimental data of [EMIM][BALA]-PMMA sorbents with different loadings (Capa\_TGA and Capa\_cal represent the experimental and calculated data, respectively).



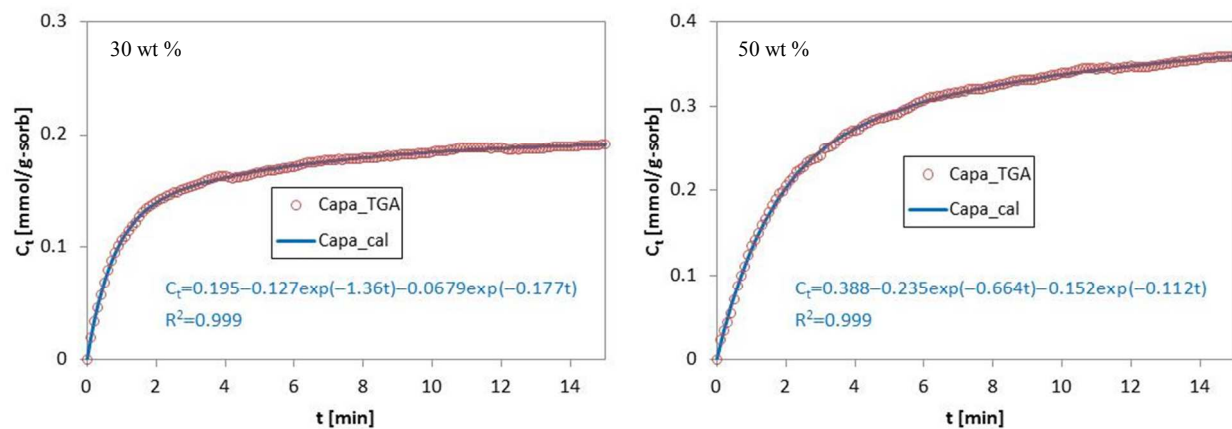

**Figure S7.** Fitted curves for CO<sub>2</sub> sorption experimental data of [EMIM][Arg]-PMMA sorbents with different loadings (Capa\_TGA and Capa\_cal represent the experimental and calculated data, respectively).

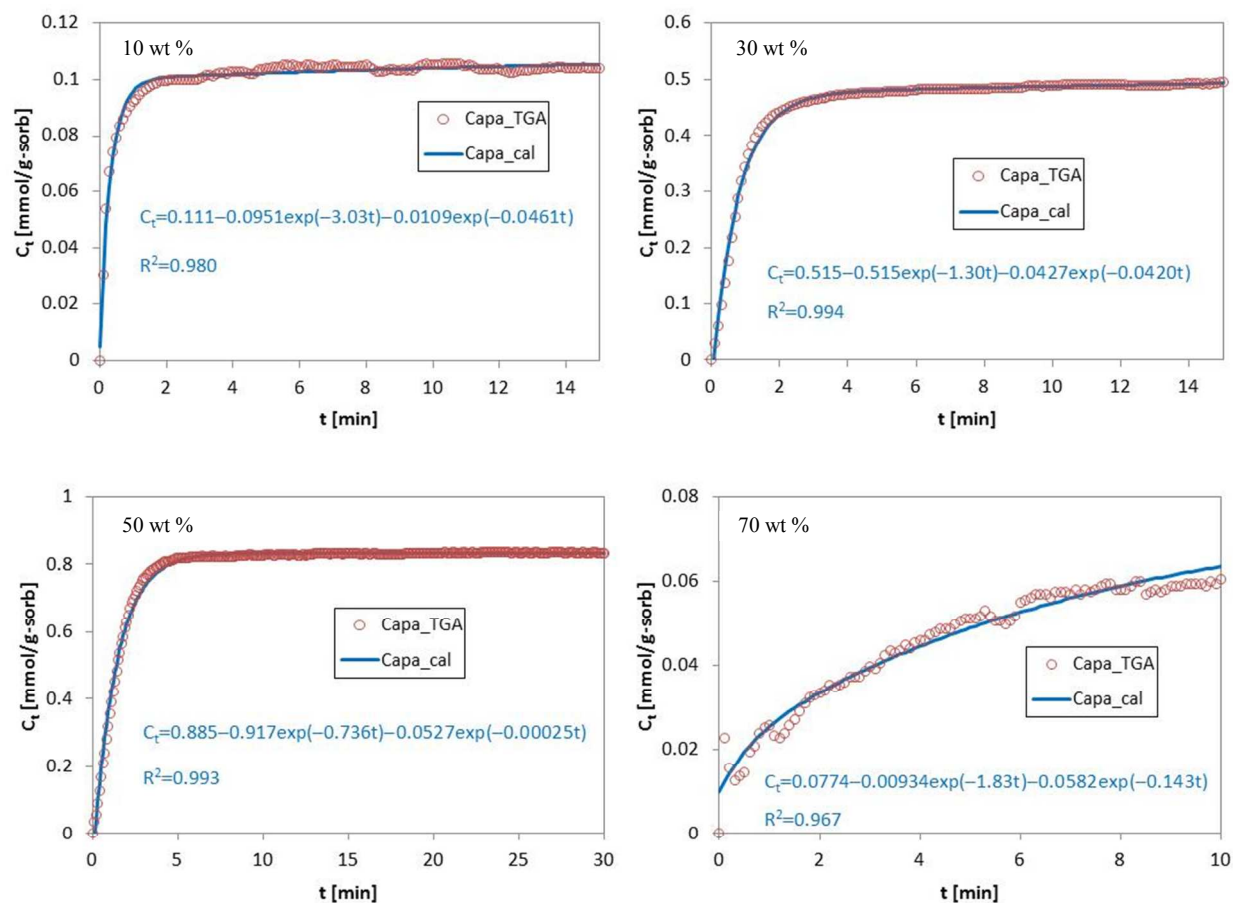

**Figure S8.** Fitted curves for CO<sub>2</sub> sorption experimental data of [P<sub>4444</sub>][Gly]-PMMA sorbents with different loadings (Capa\_TGA and Capa\_cal represent the experimental and calculated data, respectively).

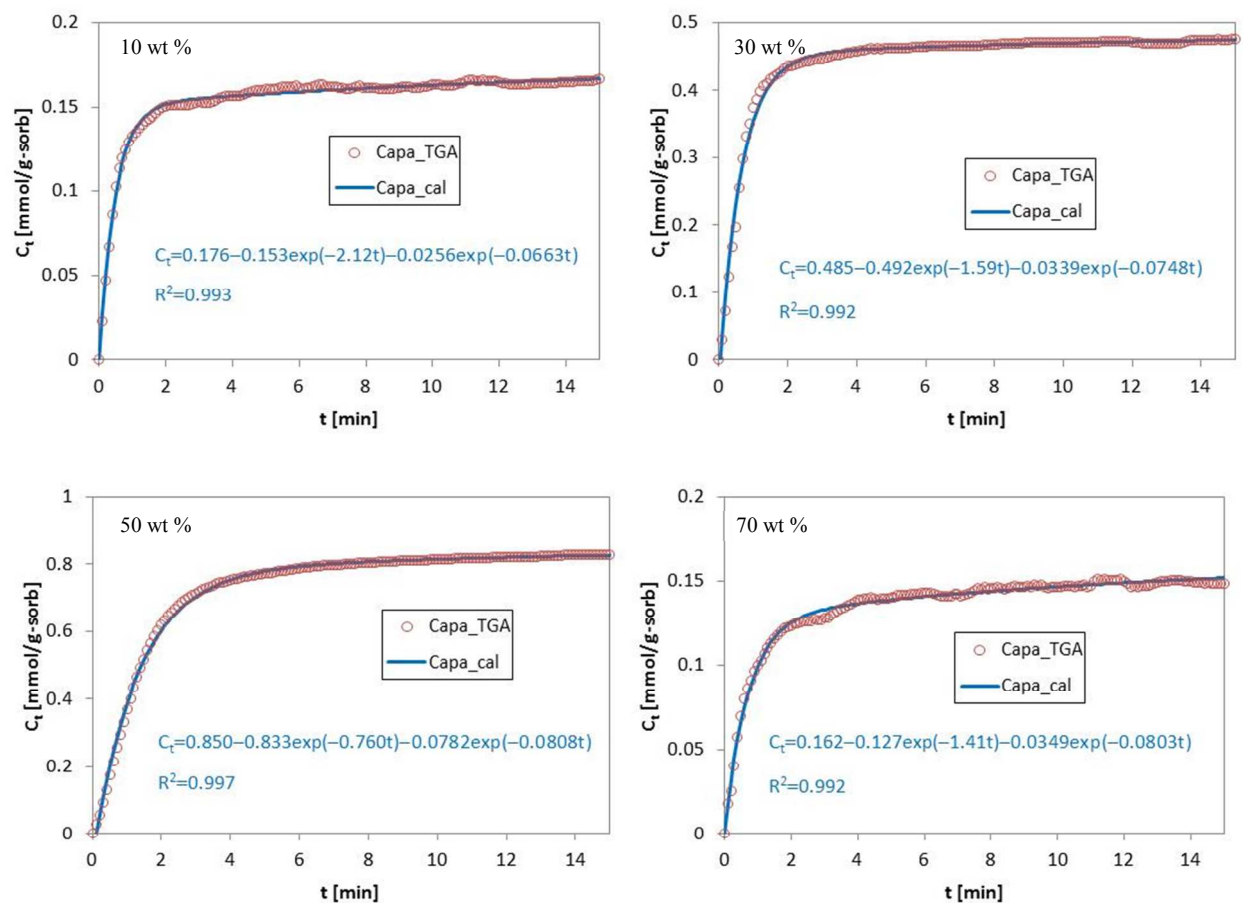

**Figure S9.** Fitted curves for CO<sub>2</sub> sorption experimental data of [P<sub>4444</sub>][Lys]-PMMA sorbents with different loadings (Capa\_TGA and Capa\_cal represent the experimental and calculated data, respectively).

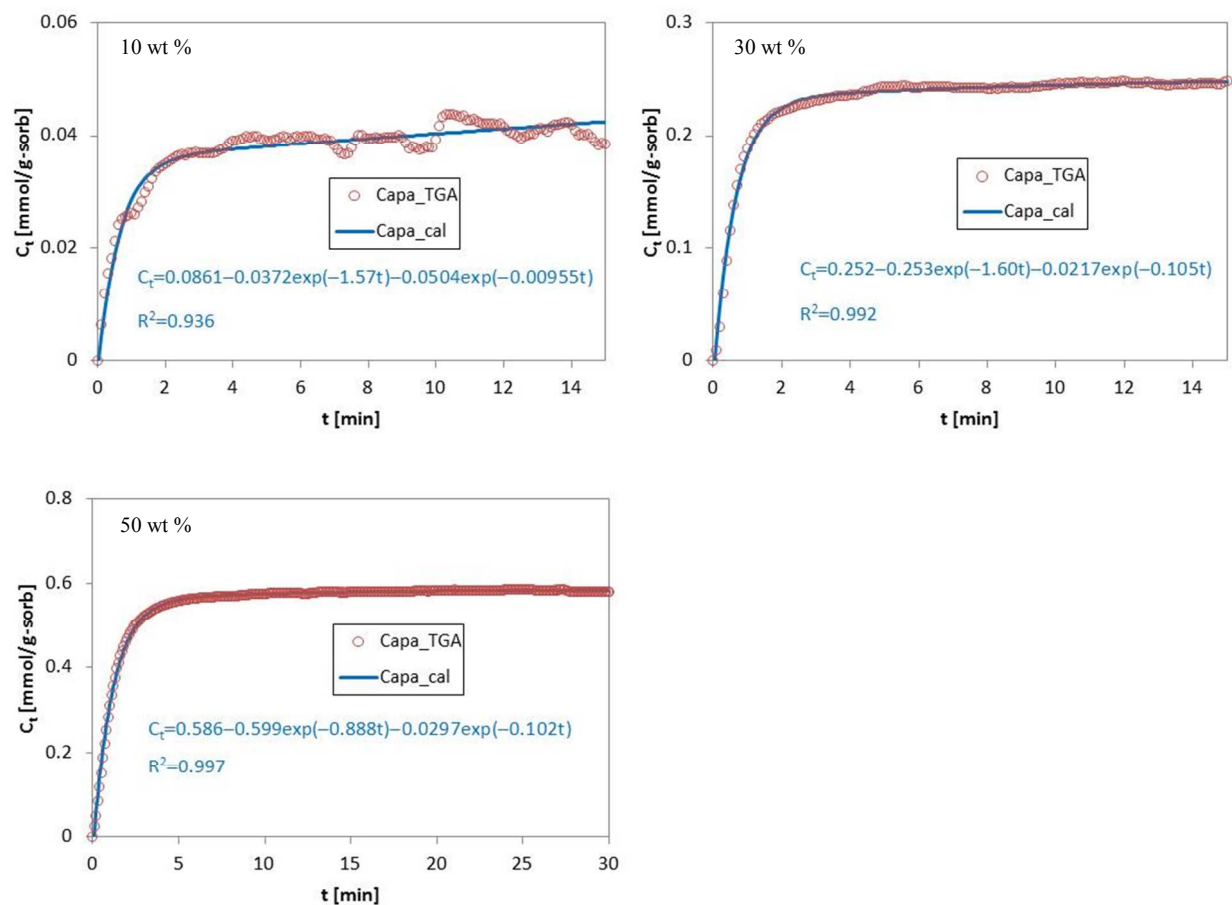

**Figure S10.** Fitted curves for CO<sub>2</sub> sorption experimental data of [P<sub>4444</sub>][His]-PMMA sorbents with different loadings (Capa\_TGA and Capa\_cal represent the experimental and calculated data, respectively).
